# Supplementary material
Source: PubMed Central journal article supplement (PMC8024002)
Supplement: nqaa390_supplement_file.pdf [file nqaa390_supplement_file.pdf]

## **ON-LINE SUPPLEMENTARY MATERIAL**

Soy protein supplementation in males following radical prostatectomy: a 2-year randomized, placebo-controlled clinical trial

Authors:

Maarten C. Bosland, Erika Enk, Joanne Schmoll, Michael J. Schlicht, Carla Randolph, Ryan J. Deaton, Hui Xie, Anne Zeleniuch-Jacquotte, and Ikuko Kato

**SUPPLEMENTARY TABLE 2** Demographic Supplement Nutritional Information  
(Calculated per 47 g Daily Serving) – Adapted from Reference 22 with permission

| Nutrient           | Amount per serving  | % of daily value <sup>1</sup> |
|--------------------|---------------------|-------------------------------|
| Protein            | 20 g <sup>2</sup>   | 36, 40                        |
| Total carbohydrate | 21 g                | 16, 7                         |
| Sugars             | 20 g                | n/a                           |
| Total fat          | 1 g <sup>2</sup>    | n/a, 1.5                      |
| Calories           | 175 kcal            | ~9 <sup>3</sup>               |
| Total isoflavones  | 41 mg <sup>4</sup>  | n/a                           |
| Genistein          | 24 mg <sup>4</sup>  | n/a                           |
| Sodium             | 200 mg <sup>2</sup> | 15, 8                         |
| Calcium            | 700 mg <sup>2</sup> | 70, 70                        |
| Phosphorus         | 500 mg              | 71, 50                        |
| Magnesium          | 40 mg               | 9.5, 10                       |
| Vitamin A          | 500 IU              | 17, 10                        |
| Vitamin C          | 2.4 mg              | 2.7, 4                        |
| Vitamin D          | 100 IU              | 17, 25                        |
| Vitamin B6         | 0.12 mg             | 7, 6                          |
| Vitamin B12        | 0.9 µg              | 38, 15                        |
| Thiamin            | 0.09 mg             | 7.5, 6                        |
| Folate             | 60 µg               | 15, 15                        |
| Riboflavin         | 0.4 mg              | 31, 24                        |
| Pantothenic acid   | 0.8 mg              | 16, 8                         |
| Zinc               | 0.9 mg              | 8, 6                          |
| Iron               | 3.6 mg              | 45, 20                        |

<sup>1</sup> % of dietary reference intake (DRI); the first number is based on the current Recommended Daily Allowances and Adequate Intakes based on the DRIs of the Nutrition Board of the Institute of Medicine <sup>21</sup> and the second number is based on the current food labeling regulations of the USFDA based on a 2,000 kcal/day diet with 50 g protein.<sup>22</sup> Amounts of saturated fats, cholesterol, and dietary fiber were negligible

<sup>2</sup> The actual measured amounts were 19.2 and 19.8 g protein, 1.12 and 0.68 g total fat, 196 and 184 mg sodium, 707 and 707 mg calcium for soy and placebo products, respectively.

<sup>3</sup> % of a 2000 kcal diet.

<sup>4</sup> Isoflavones (as aglycone equivalents) from soy not present in the placebo product.

n/a = not applicable.
